# Supplementary material
Source: PubMed Central journal article supplement (PMC8411851)
Supplement: table_si_dez305.pdf [file table_si_dez305.pdf]

**Supplemental Table S1 Omega fatty acid serum concentrations, presented as mean  $\pm$  standard deviation, by participant characteristic.**

|                                                    | ALA               | EPA               | DHA               | LA                | DGLA              | AA                |
|----------------------------------------------------|-------------------|-------------------|-------------------|-------------------|-------------------|-------------------|
| Age (years)                                        |                   |                   |                   |                   |                   |                   |
| 30–34                                              | 0.048 $\pm$ 0.035 | 0.004 $\pm$ 0.003 | 0.024 $\pm$ 0.015 | 0.001 $\pm$ 0.011 | 0.007 $\pm$ 0.004 | 0.047 $\pm$ 0.017 |
| 35–37                                              | 0.060 $\pm$ 0.051 | 0.005 $\pm$ 0.003 | 0.026 $\pm$ 0.014 | 0.017 $\pm$ 0.014 | 0.008 $\pm$ 0.004 | 0.048 $\pm$ 0.019 |
| 38–44                                              | 0.040 $\pm$ 0.027 | 0.005 $\pm$ 0.006 | 0.025 $\pm$ 0.018 | 0.015 $\pm$ 0.010 | 0.007 $\pm$ 0.003 | 0.046 $\pm$ 0.016 |
| BMI (kg/m <sup>2</sup> )                           |                   |                   |                   |                   |                   |                   |
| < 18.50                                            | 0.050 $\pm$ 0.049 | 0.006 $\pm$ 0.004 | 0.023 $\pm$ 0.012 | 0.012 $\pm$ 0.006 | 0.007 $\pm$ 0.001 | 0.051 $\pm$ 0.016 |
| 18.50–24.99                                        | 0.046 $\pm$ 0.038 | 0.005 $\pm$ 0.003 | 0.025 $\pm$ 0.015 | 0.014 $\pm$ 0.011 | 0.007 $\pm$ 0.004 | 0.045 $\pm$ 0.016 |
| 25.00–29.99                                        | 0.049 $\pm$ 0.033 | 0.005 $\pm$ 0.003 | 0.025 $\pm$ 0.013 | 0.016 $\pm$ 0.010 | 0.008 $\pm$ 0.004 | 0.051 $\pm$ 0.022 |
| $\geq$ 30                                          | 0.052 $\pm$ 0.045 | 0.005 $\pm$ 0.003 | 0.022 $\pm$ 0.015 | 0.018 $\pm$ 0.012 | 0.008 $\pm$ 0.004 | 0.051 $\pm$ 0.017 |
| Nulliparous                                        | 0.047 $\pm$ 0.040 | 0.005 $\pm$ 0.003 | 0.025 $\pm$ 0.014 | 0.014 $\pm$ 0.011 | 0.007 $\pm$ 0.004 | 0.047 $\pm$ 0.016 |
| Multiparous                                        | 0.049 $\pm$ 0.036 | 0.005 $\pm$ 0.004 | 0.023 $\pm$ 0.015 | 0.016 $\pm$ 0.011 | 0.007 $\pm$ 0.003 | 0.048 $\pm$ 0.016 |
| Regular periods                                    | 0.047 $\pm$ 0.037 | 0.005 $\pm$ 0.003 | 0.024 $\pm$ 0.014 | 0.014 $\pm$ 0.010 | 0.007 $\pm$ 0.003 | 0.047 $\pm$ 0.017 |
| Irregular periods                                  | 0.053 $\pm$ 0.044 | 0.005 $\pm$ 0.004 | 0.024 $\pm$ 0.019 | 0.018 $\pm$ 0.014 | 0.008 $\pm$ 0.005 | 0.048 $\pm$ 0.020 |
| Race                                               |                   |                   |                   |                   |                   |                   |
| White                                              | 0.015 $\pm$ 0.011 | 0.005 $\pm$ 0.003 | 0.024 $\pm$ 0.014 | 0.015 $\pm$ 0.011 | 0.007 $\pm$ 0.004 | 0.047 $\pm$ 0.017 |
| Non-White                                          | 0.015 $\pm$ 0.011 | 0.005 $\pm$ 0.003 | 0.026 $\pm$ 0.017 | 0.015 $\pm$ 0.011 | 0.007 $\pm$ 0.003 | 0.049 $\pm$ 0.017 |
| Education level                                    |                   |                   |                   |                   |                   |                   |
| College or less                                    | 0.015 $\pm$ 0.010 | 0.004 $\pm$ 0.003 | 0.022 $\pm$ 0.014 | 0.015 $\pm$ 0.010 | 0.008 $\pm$ 0.004 | 0.049 $\pm$ 0.018 |
| Some graduate school or more                       | 0.015 $\pm$ 0.011 | 0.005 $\pm$ 0.003 | 0.025 $\pm$ 0.015 | 0.015 $\pm$ 0.011 | 0.007 $\pm$ 0.004 | 0.047 $\pm$ 0.017 |
| Married                                            | 0.014 $\pm$ 0.011 | 0.006 $\pm$ 0.005 | 0.025 $\pm$ 0.013 | 0.014 $\pm$ 0.011 | 0.008 $\pm$ 0.004 | 0.049 $\pm$ 0.016 |
| Not married                                        | 0.015 $\pm$ 0.011 | 0.005 $\pm$ 0.003 | 0.024 $\pm$ 0.015 | 0.015 $\pm$ 0.011 | 0.007 $\pm$ 0.004 | 0.047 $\pm$ 0.017 |
| Smoking status                                     |                   |                   |                   |                   |                   |                   |
| Never                                              | 0.048 $\pm$ 0.038 | 0.005 $\pm$ 0.003 | 0.025 $\pm$ 0.015 | 0.015 $\pm$ 0.011 | 0.007 $\pm$ 0.004 | 0.048 $\pm$ 0.017 |
| Past                                               | 0.048 $\pm$ 0.042 | 0.005 $\pm$ 0.003 | 0.022 $\pm$ 0.015 | 0.014 $\pm$ 0.010 | 0.007 $\pm$ 0.004 | 0.044 $\pm$ 0.017 |
| Current                                            | 0.029 $\pm$ 0.018 | 0.007 $\pm$ 0.005 | 0.021 $\pm$ 0.010 | 0.011 $\pm$ 0.008 | 0.006 $\pm$ 0.001 | 0.045 $\pm$ 0.011 |
| History of depression                              | 0.045 $\pm$ 0.035 | 0.006 $\pm$ 0.004 | 0.024 $\pm$ 0.012 | 0.014 $\pm$ 0.010 | 0.007 $\pm$ 0.004 | 0.046 $\pm$ 0.016 |
| No history of depression                           | 0.049 $\pm$ 0.039 | 0.004 $\pm$ 0.003 | 0.024 $\pm$ 0.016 | 0.015 $\pm$ 0.012 | 0.007 $\pm$ 0.004 | 0.048 $\pm$ 0.018 |
| Hormonal contraceptive use in previous 3 months    | 0.040 $\pm$ 0.028 | 0.004 $\pm$ 0.003 | 0.024 $\pm$ 0.016 | 0.014 $\pm$ 0.010 | 0.007 $\pm$ 0.004 | 0.048 $\pm$ 0.020 |
| No hormonal contraceptive use in previous 3 months | 0.050 $\pm$ 0.041 | 0.005 $\pm$ 0.003 | 0.024 $\pm$ 0.014 | 0.015 $\pm$ 0.012 | 0.007 $\pm$ 0.004 | 0.047 $\pm$ 0.016 |
| Hormonal contraceptive use in previous year        | 0.044 $\pm$ 0.036 | 0.005 $\pm$ 0.003 | 0.025 $\pm$ 0.015 | 0.014 $\pm$ 0.011 | 0.007 $\pm$ 0.004 | 0.048 $\pm$ 0.018 |
| No hormonal contraceptive use in previous year     | 0.051 $\pm$ 0.040 | 0.005 $\pm$ 0.004 | 0.023 $\pm$ 0.014 | 0.015 $\pm$ 0.011 | 0.007 $\pm$ 0.004 | 0.047 $\pm$ 0.017 |

AA, arachidonic acid; ALA, alpha linolenic acid; BMI, body mass index; DGLA, dihomo-gamma linolenic acid; DHA, docosahexaenoic acid; EPA, eicosapentanoic acid; LA, linoleic acid; SD, standard deviation.
